# Supplementary material for: Effects of Rice Bran Arabinoxylan Compound on Quality of Life of Cancer Patients During Active Treatment: A Randomised Placebo-controlled Pilot Trial
Source: Research Square preprint supplement (doi:10.21203/rs.3.rs-5837950/v1), 2025-03-24
Supplement: Supplementary file 1 [file fa1a437f788f6143a8844e0c.docx]

# Supplementary – Summary of RM-ANOVA Results (F-statistics)

## Primary outcome measures

| **Outcome** | **Effect** | **DFn** | **DFd** | **F-statistic** | ***p*-value** | **eta2[g]** | **Sphericity** | ***p*-value (GG)** |
| --- | --- | --- | --- | --- | --- | --- | --- | --- |
| QL2 | Group | 1 | 15 | 5.666 | **0.031 *** | 0.147 |  |  |
|  | Visit | 4 | 60 | 0.230 | 0.920 | 0.008 | Failed | 0.837 |
|  | Group: Visit | 4 | 60 | 1.188 | 0.325 | 0.041 | Failed | 0.323 |
| **Abbreviations:** QL2, global quality of life scale. | | | | | | | | |

## Secondary and exploratory outcome measures

### Body composition

| **Outcome** | **Effect** | **DFn** | **DFd** | **F-statistic** | ***p*-value** | **eta2[g]** | **Sphericity** | ***p*-value (GG)** |
| --- | --- | --- | --- | --- | --- | --- | --- | --- |
| Weight | Group | 1 | 12 | 2.155 | 0.168 | 0.152 |  |  |
|  | Visit | 4 | 48 | 1.654 | 0.176 | <0.001 | Failed | 0.207 |
|  | Group: Visit | 4 | 48 | 0.618 | 0.652 | <0.001 | Failed | 0.570 |
| BMI | Group | 1 | 12 | 0.345 | 0.568 | 0.028 |  |  |
|  | Visit | 4 | 48 | 1.726 | 0.160 | <0.001 | Failed | 0.193 |
|  | Group: Visit | 4 | 48 | 0.569 | 0.686 | <0.001 | Failed | 0.595 |
| Body Fat % | *Too much missing data – not analysed* | | | | | | | |
| Muscle Mass | *Too much missing data – not analysed* | | | | | | | |
| **Abbreviations:** BMI, body mass index. | | | | | | | | |

### Nutritional status indices

| **Outcome** | **Effect** | **DFn** | **DFd** | **F-statistic** | ***p*-value** | **eta2[g]** | **Sphericity** | ***p*-value (GG)** |
| --- | --- | --- | --- | --- | --- | --- | --- | --- |
| NLR | Group | 1 | 15 | 1.595 | 0.226 | 0.064 |  |  |
|  | Visit | 4 | 60 | 1.364 | 0.257 | 0.031 | Passed |  |
|  | Group: Visit | 4 | 60 | 0.565 | 0.689 | 0.013 | Passed |  |
| INI1 | Group | 1 | 14 | 0.295 | 0.596 | 0.016 |  |  |
|  | Visit | 4 | 56 | 1.246 | 0.302 | 0.020 | Failed | 0.303 |
|  | Group: Visit | 4 | 56 | 0.474 | 0.754 | 0.008 | Failed | 0.625 |
| INI2 | Group | 1 | 14 | 0.311 | 0.586 | 0.017 |  |  |
|  | Visit | 4 | 56 | 1.311 | 0.277 | 0.020 | Failed | 0.268 |
|  | Group: Visit | 4 | 56 | 0.473 | 0.756 | 0.007 | Failed | 0.638 |
| HALP | Group | 1 | 15 | 1.859 | 0.193 | 0.094 |  |  |
|  | Visit | 4 | 60 | 0.740 | 0.568 | 0.008 | Passed |  |
|  | Group: Visit | 4 | 60 | 0.840 | 0.505 | 0.009 | Passed |  |
| A\G | Group | 1 | 14 | 0.317 | 0.582 | 0.015 |  |  |
|  | Visit | 4 | 56 | 0.088 | 0.986 | 0.002 | Failed | 0.906 |
|  | Group: Visit | 4 | 56 | 1.247 | 0.302 | 0.029 | Failed | 0.302 |
| IBI | Group | 1 | 14 | 0.766 | 0.396 | 0.042 |  |  |
|  | Visit | 4 | 56 | 1.249 | 0.301 | 0.018 | Passed |  |
|  | Group: Visit | 4 | 56 | 0.528 | 0.715 | 0.008 | Passed |  |
| **Abbreviations:** A\G, albumin to globulin ratio; HALP, haemoglobin, albumin, lymphocyte, and platelet score; INI1, inflammatory-nutritional index 1 (C-reactive protein/albumin); INI2, inflammatory-nutritional index 2 (C-reactive protein/prealbumin); NLR, Neutrophil to Lymphocyte ratio. | | | | | | | | |

### Cytokine markers

| **Outcome** | **Effect** | **DFn** | **DFd** | **F-statistic** | ***p*-value** | **eta2[g]** | **Sphericity** | ***p*-value (GG)** |
| --- | --- | --- | --- | --- | --- | --- | --- | --- |
| GM-CSF | Group | 1 | 11 | 0.019 | 0.894 | 0.001 |  |  |
|  | Visit | 4 | 44 | 0.317 | 0.317 | 0.022 | Passed |  |
|  | Group: Visit | 4 | 44 | 0.314 | 0.314 | 0.022 | Passed |  |
| INF-γ | Group | 1 | 11 | 2.266 | 0.285 | 0.097 |  |  |
|  | Visit | 4 | 44 | 2.887 | **0.033 *** | 0.017 | Passed |  |
|  | Group: Visit | 4 | 44 | 0.298 | 0.298 | 0.008 | Passed |  |
| IL-1β | Group | 1 | 11 | 0.747 | 0.406 | 0.060 |  |  |
|  | Visit | 4 | 44 | 2.118 | 0.095 | 0.010 | Passed |  |
|  | Group: Visit | 4 | 44 | 1.203 | 0.323 | 0.006 | Passed |  |
| IL-1RA | Group | 1 | 11 | 1.265 | 0.285 | 0.091 |  |  |
|  | Visit | 4 | 44 | 2.716 | **0.042 *** | 0.030 | Passed |  |
|  | Group: Visit | 4 | 44 | 0.836 | 0.510 | 0.010 | Passed |  |
| IL-2 | Group | 1 | 11 | 1.256 | 0.285 | 0.094 |  |  |
|  | Visit | 4 | 44 | 2.703 | **0.043 *** | 0.023 | Failed | 0.089 |
|  | Group: Visit | 4 | 44 | 1.223 | 0.315 | 0.010 | Failed | 0.314 |
| IL-4 | Group | 1 | 11 | 1.600 | 0.232 | 0.119 |  |  |
|  | Visit | 4 | 44 | 0.876 | 0.486 | 0.006 | Passed |  |
|  | Group: Visit | 4 | 44 | 0.413 | 0.799 | 0.003 | Passed |  |
| IL-5 | Group | 1 | 11 | 0.095 | 0.764 | 0.006 |  |  |
|  | Visit | 4 | 44 | 0.729 | 0.577 | 0.021 | Passed |  |
|  | Group: Visit | 4 | 44 | 0.816 | 0.522 | 0.023 | Passed |  |
| IL-6 | Group | 1 | 11 | 0.982 | 0.343 | 0.069 |  |  |
|  | Visit | 4 | 44 | 1.406 | 0.248 | 0.022 | Failed | 0.264 |
|  | Group: Visit | 4 | 44 | 0.538 | 0.709 | 0.008 | Failed | 0.626 |
| IL-8 | Group | 1 | 11 | 0.195 | 0.668 | 0.014 |  |  |
|  | Visit | 4 | 44 | 1.390 | 0.253 | 0.027 | Passed |  |
|  | Group: Visit | 4 | 44 | 0.096 | 0.983 | 0.002 | Passed |  |
| IL-10 | Group | 1 | 11 | 0.140 | 0.715 | 0.010 |  |  |
|  | Visit | 4 | 44 | 1.089 | 0.374 | 0.019 | Failed | 0.363 |
|  | Group: Visit | 4 | 44 | 0.497 | 0.738 | 0.009 | Failed | 0.657 |
| IL-12p40 | Group | 1 | 11 | 0.359 | 0.561 | 0.028 |  |  |
|  | Visit | 4 | 44 | 2.792 | **0.038 ^** | 0.027 | Passed |  |
|  | Group: Visit | 4 | 44 | 1.223 | 0.315 | 0.012 | Passed |  |
| IL-12p70 | Group | 1 | 11 | 1.700 | 0.219 | 0.127 |  |  |
|  | Visit | 4 | 44 | 1.358 | 0.264 | 0.008 | Passed |  |
|  | Group: Visit | 4 | 44 | 1.071 | 0.382 | 0.006 | Passed |  |
| IL-13 | Group | 1 | 11 | 2.891 | 0.117 | 0.196 |  |  |
|  | Visit | 4 | 44 | 0.298 | 0.878 | 0.002 | Passed |  |
|  | Group: Visit | 4 | 44 | 0.297 | 0.878 | 0.002 | Passed |  |
| MCP1 | Group | 1 | 11 | 0.975 | 0.345 | 0.060 |  |  |
|  | Visit | 4 | 44 | 1.637 | 0.182 | 0.039 | Passed |  |
|  | Group: Visit | 4 | 44 | 0.316 | 0.866 | 0.008 | Passed |  |
| TNF-α | Group | 1 | 11 | 0.255 | 0.623 | 0.021 |  |  |
|  | Visit | 4 | 44 | 0.961 | 0.439 | 0.007 | Passed |  |
|  | Group: Visit | 4 | 44 | 0.314 | 0.867 | 0.002 | Passed |  |
| **Abbreviations:** GM-CSF, granulocyte-macrophage colony-stimulating factor; IL, interleukin; INF, interferon; MCP, monocyte chemoattractant protein; RA, receptor antagonist; TNF, tumour necrosis factor. | | | | | | | | |

## Safety outcome analysis

### Full blood count

| **Outcome** | **Effect** | **DFn** | **DFd** | **F-statistic** | ***p*-value** | **eta2[g]** | **Sphericity** | ***p*-value (GG)** |
| --- | --- | --- | --- | --- | --- | --- | --- | --- |
| RBC | Group | 1 | 15 | 0.820 | 0.380 | 0.038 |  |  |
|  | Visit | 4 | 60 | 1.968 | 0.111 | 0.035 | Failed | 0.159 |
|  | Group: Visit | 4 | 60 | 0.176 | 0.950 | 0.003 | Failed | 0.831 |
| Haemoglobin | Group | 1 | 15 | 0.625 | 0.441 | 0.033 |  |  |
|  | Visit | 4 | 60 | 1.051 | 0.389 | 0.012 | Passed |  |
|  | Group: Visit | 4 | 60 | 0.522 | 0.720 | 0.006 | Passed |  |
| Haematocrit | Group | 1 | 15 | 1.031 | 0.326 | 0.053 |  |  |
|  | Visit | 4 | 60 | 1.473 | 0.222 | 0.018 | Passed |  |
|  | Group: Visit | 4 | 60 | 0.428 | 0.405 | 0.005 | Passed |  |
| MCV | Group | 1 | 15 | 0.736 | 0.933 | 0.030 |  |  |
|  | Visit | 4 | 60 | 0.208 | 0.336 | 0.005 | Failed | 0.745 |
|  | Group: Visit | 4 | 60 | 1.165 | 0.339 | 0.028 | Failed | 0.315 |
| MCH | Group | 1 | 15 | 2.108 | 0.167 | 0.091 |  |  |
|  | Visit | 4 | 60 | 1.085 | 0.372 | 0.020 | Failed | 0.334 |
|  | Group: Visit | 4 | 60 | 0.773 | 0.547 | 0.014 | Failed | 0.432 |
| MCHC | Group | 1 | 15 | 2.279 | 0.152 | 0.105 |  |  |
|  | Visit | 4 | 60 | 2.490 | 0.053 | 0.036 | Passed |  |
|  | Group: Visit | 4 | 60 | 0.368 | 0.831 | 0.005 | Passed |  |
| RDW | Group | 1 | 15 | 1.018 | 0.329 | 0.051 |  |  |
|  | Visit | 4 | 60 | 1.032 | 0.398 | 0.014 | Failed | 0.422 |
|  | Group: Visit | 4 | 60 | 1.110 | 0.360 | 0.015 | Failed | 0.399 |
| Platelet | Group | 1 | 15 | 0.054 | 0.820 | 0.002 |  |  |
|  | Visit | 4 | 60 | 0.440 | 0.779 | 0.009 | Passed |  |
|  | Group: Visit | 4 | 60 | 1.356 | 0.260 | 0.028 | Passed |  |
| WBC | Group | 1 | 15 | 0.958 | 0.343 | 0.034 |  |  |
|  | Visit | 4 | 60 | 2.540 | **0.049 *** | 0.071 | Passed |  |
|  | Group: Visit | 4 | 60 | 0.840 | 0.506 | 0.025 | Passed |  |
| Neutrophils | Group | 1 | 15 | 0.272 | 0.610 | 0.008 |  |  |
|  | Visit | 4 | 60 | 2.277 | 0.071 | 0.075 | Passed |  |
|  | Group: Visit | 4 | 60 | 0.522 | 0.720 | 0.018 | Passed |  |
| Lymphocytes | Group | 1 | 15 | 3.268 | 0.091 | 0.146 |  |  |
|  | Visit | 4 | 60 | 0.445 | 0.776 | 0.006 | Passed |  |
|  | Group: Visit | 4 | 60 | 1.264 | 0.294 | 0.018 | Passed |  |
| Monocytes | Group | 1 | 15 | 0.016 | 0.900 | <0.001 |  |  |
|  | Visit | 4 | 60 | 1.028 | 0.400 | 0.034 | Passed |  |
|  | Group: Visit | 4 | 60 | 1.556 | 0.198 | 0.051 | Passed |  |
| Eosinophils | Group | 1 | 15 | 0.267 | 0.613 | 0.011 |  |  |
|  | Visit | 4 | 60 | 0.235 | 0.918 | 0.006 | Failed | 0.845 |
|  | Group: Visit | 4 | 60 | 1.461 | 0.225 | 0.035 | Failed | 0.243 |
| Basophils | Group | 1 | 15 | 0.312 | 0.585 | 0.013 |  |  |
|  | Visit | 4 | 60 | 0.645 | 0.632 | 0.016 | Failed | 0.569 |
|  | Group: Visit | 4 | 60 | 1.052 | 0.388 | 0.026 | Failed | 0.374 |
| **Abbreviations:** MCH, mean corpuscular haemoglobin;MCHC, mean corpuscular haemoglobin concentration; MCV, mean corpuscular volume; RBC, red blood cell count; RDW, red blood cell distribution width; WBC, white blood cell count. | | | | | | | | |

### Electrolytes, urea, and creatinine

| **Outcome** | **Effect** | **DFn** | **DFd** | **F-statistic** | ***p*-value** | **eta2[g]** | **Sphericity** | ***p*-value (GG)** |
| --- | --- | --- | --- | --- | --- | --- | --- | --- |
| Sodium | Group | 1 | 15 | 0.449 | 0.513 | 0.007 |  |  |
|  | Visit | 4 | 60 | 0.921 | 0.458 | 0.045 | Failed | 0.361 |
|  | Group: Visit | 4 | 60 | 0.634 | 0.640 | 0.031 | Failed | 0.452 |
| Potassium | Group | 1 | 15 | <0.001 | 0.991 | <0.001 |  |  |
|  | Visit | 4 | 60 | 0.475 | 0.754 | 0.011 | Failed | 0.672 |
|  | Group: Visit | 4 | 60 | 0.453 | 0.770 | 0.010 | Failed | 0.687 |
| Chloride | Group | 1 | 15 | 0.064 | 0.804 | 0.002 |  |  |
|  | Visit | 4 | 60 | 1.607 | 0.184 | 0.042 | Passed |  |
|  | Group: Visit | 4 | 60 | 0.502 | 0.734 | 0.014 | Passed |  |
| Bicarbonate | Group | 1 | 15 | <0.001 | 0.998 | <0.001 |  |  |
|  | Visit | 4 | 60 | 0.533 | 0.712 | 0.011 | Passed |  |
|  | Group: Visit | 4 | 60 | 0.392 | 0.814 | 0.008 | Passed |  |
| Urea | Group | 1 | 15 | 1.040 | 0.324 | 0.051 |  |  |
|  | Visit | 4 | 60 | 0.945 | 0.444 | 0.014 | Failed | 0.400 |
|  | Group: Visit | 4 | 60 | 0.696 | 0.598 | 0.011 | Failed | 0.507 |
| Creatinine | Group | 1 | 15 | 0.078 | 0.784 | 0.012 |  |  |
|  | Visit | 4 | 60 | 2.758 | **0.036 *** | 0.037 | Failed | 0.083 |
|  | Group: Visit | 4 | 60 | 1.146 | 0.344 | 0.018 | Failed | 0.330 |
| **Abbreviations:** | | | | | | | | |

### Liver function test

| **Outcome** | **Effect** | **DFn** | **DFd** | **F-statistic** | ***p*-value** | **eta2[g]** | **Sphericity** | ***p*-value (GG)** |
| --- | --- | --- | --- | --- | --- | --- | --- | --- |
| Total Bilirubin | Group | 1 | 15 | 0.911 | 0.355 | 0.042 |  |  |
|  | Visit | 4 | 60 | 1882 | 0.125 | 0.034 | Passed |  |
|  | Group: Visit | 4 | 60 | 2.379 | 0.062 | 0.043 | Passed |  |
| Total Protein | Group | 1 | 14 | 2.324 | 0.150 | 0.111 |  |  |
|  | Visit | 4 | 56 | 0.530 | 0.714 | 0.009 | Passed |  |
|  | Group: Visit | 4 | 56 | 3.057 | **0.024 *** | 0.051 | Passed |  |
| Albumin | Group | 1 | 15 | <0.001 | 0.978 | <0.001 |  |  |
|  | Visit | 4 | 60 | 0.292 | 0.882 | 0.003 | Failed | 0.770 |
|  | Group: Visit | 4 | 60 | 0.095 | 0.984 | 0.001 | Failed | 0.925 |
| AST | Group | 1 | 15 | 0.510 | 0.486 | 0.026 |  |  |
|  | Visit | 4 | 60 | 2.855 | **0.031 *** | 0.040 | Passed |  |
|  | Group: Visit | 4 | 60 | 0.764 | 0.553 | 0.011 | Passed |  |
| ALT | Group | 1 | 15 | 1.125 | 0.306 | 0.059 |  |  |
|  | Visit | 4 | 60 | 0.696 | 0.597 | 0.007 | Passed |  |
|  | Group: Visit | 4 | 60 | 0.570 | 0.685 | 0.006 | Passed |  |
| ALP | Group | 1 | 15 | 0.045 | 0.835 | 0.003 |  |  |
|  | Visit | 4 | 60 | 1.709 | 0.160 | 0.012 | Passed |  |
|  | Group: Visit | 4 | 60 | 0.874 | 0.485 | 0.006 | Passed |  |
| GGT | Group | 1 | 15 | 0.031 | 0.864 | 0.002 |  |  |
|  | Visit | 4 | 60 | 0.464 | 0.762 | 0.003 | Passed |  |
|  | Group: Visit | 4 | 60 | 1.643 | 0.175 | 0.011 | Passed |  |
| **Abbreviations:** ALP, alkaline phosphatase; ALT, alanine aminotransferase; AST, aspartate transferase; GGT, gamma-glutamyl transferase. | | | | | | | | |

### Additional tests

| **Outcome** | **Effect** | **DFn** | **DFd** | **F-statistic** | ***p*-value** | **eta2[g]** | **Sphericity** | ***p*-value (GG)** |
| --- | --- | --- | --- | --- | --- | --- | --- | --- |
| CRP | Group | 1 | 14 | 0.309 | 0.587 | 0.017 |  |  |
|  | Visit | 4 | 56 | 1.225 | 0.311 | 0.019 | Failed | 0.310 |
|  | Group: Visit | 4 | 56 | 0.495 | 0.740 | 0.008 | Failed | 0.620 |
| Prealbumin | Group | 1 | 14 | 0.033 | 0.859 | 0.002 |  |  |
|  | Visit | 4 | 56 | 0.794 | 0.534 | 0.011 | Passed |  |
|  | Group: Visit | 4 | 56 | 1.337 | 0.267 | 0.019 | Passed |  |
| **Abbreviations:** CRP, C-reactive protein. | | | | | | | | |
